# Supplementary material
Source: ML conference proceedings conference paper supplement (https://openreview.net/forum?id=DTD9BRDWtkn)

# ReLU Activations

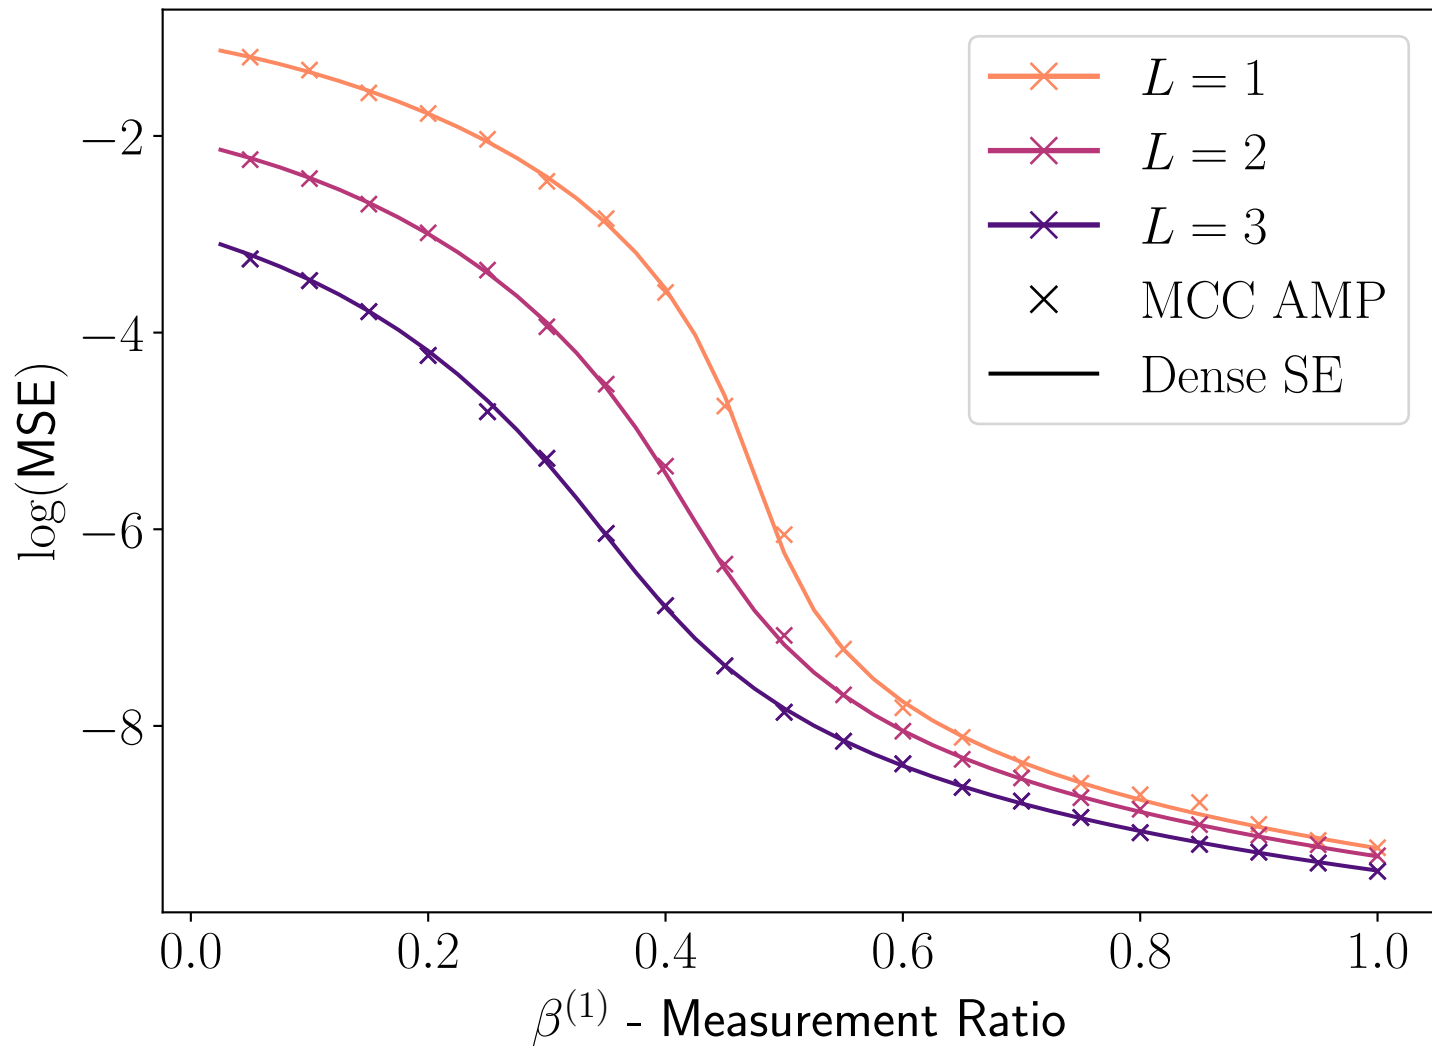

Supplement: supplementary_material [file attachment]

AMP Iterates for  $\rho = 0.25$  ( $q = 10, P = 100$ )

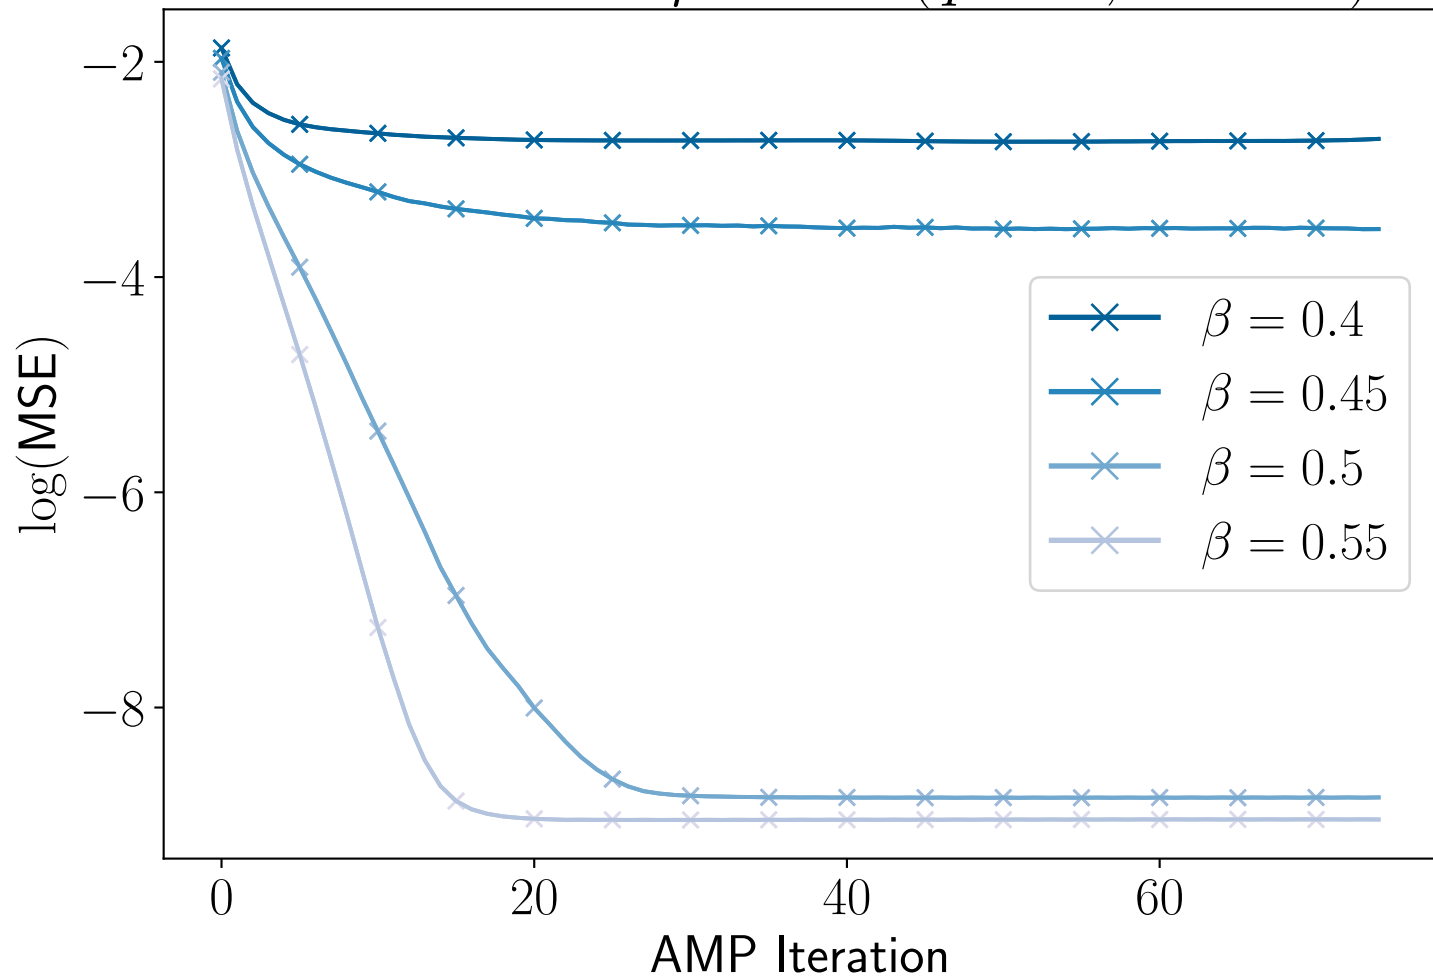

Supplement: supplementary_material [file attachment]

# Sparse Compressive Sensing ( $q = 10, P = 100$ )

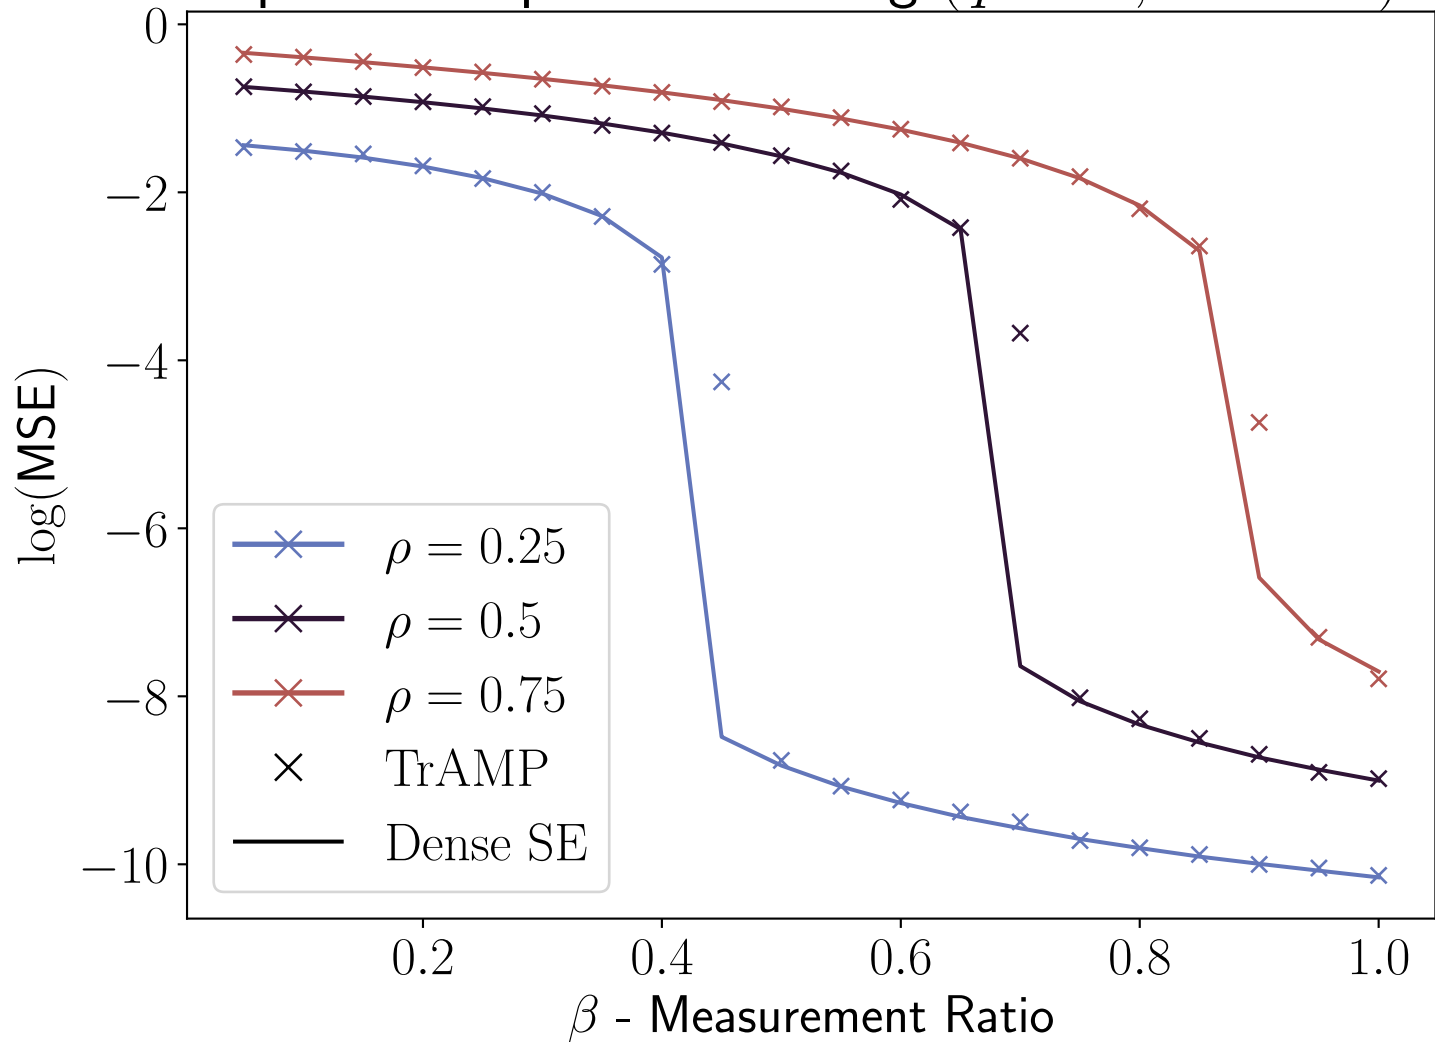

Supplement: supplementary_material [file attachment]

AMP Iterates for  $\rho = 0.25$  ( $q = 10, P = 1024$ )

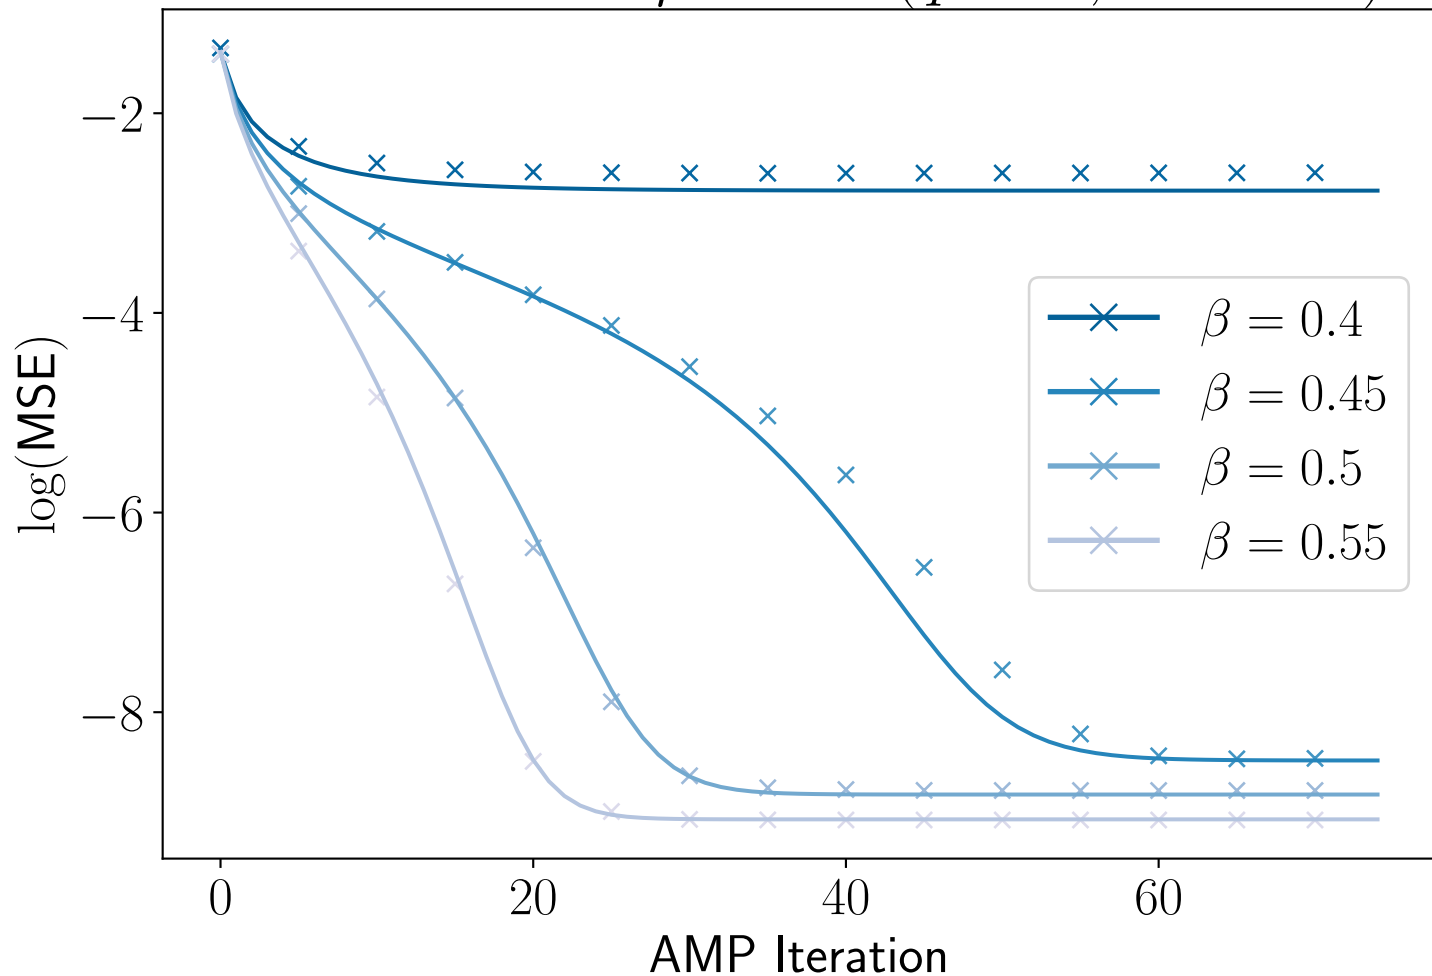

Supplement: supplementary_material [file attachment]

# Sparse Compressive Sensing ( $q = 10, P = 1024$ )

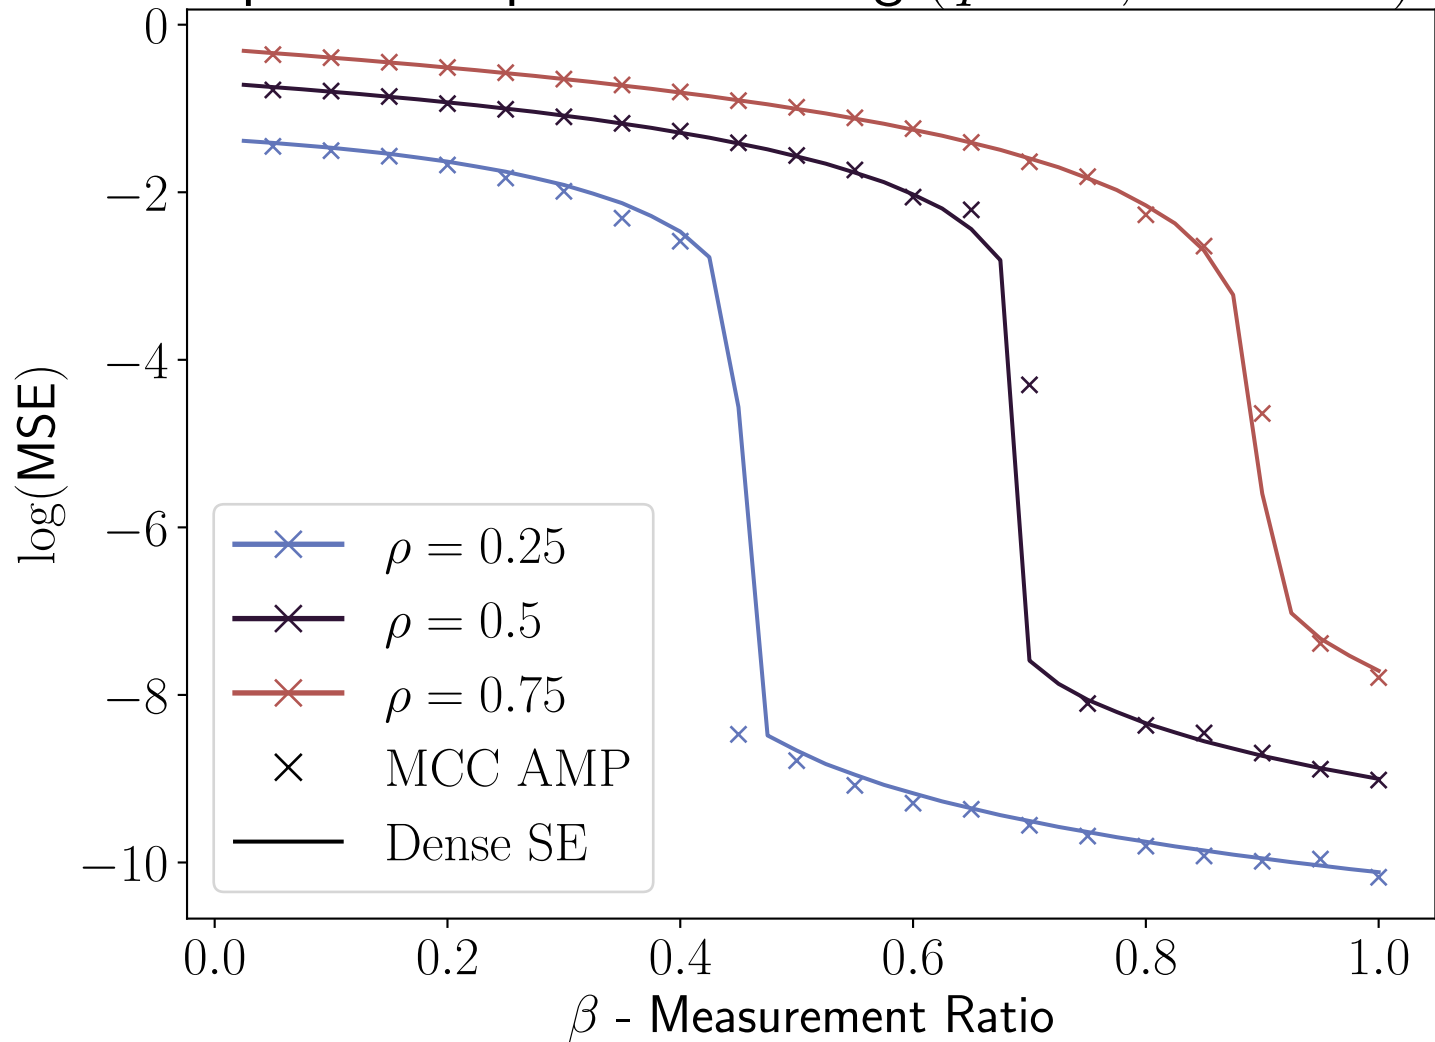

Supplement: supplementary_material [file attachment]

# Linear Activations

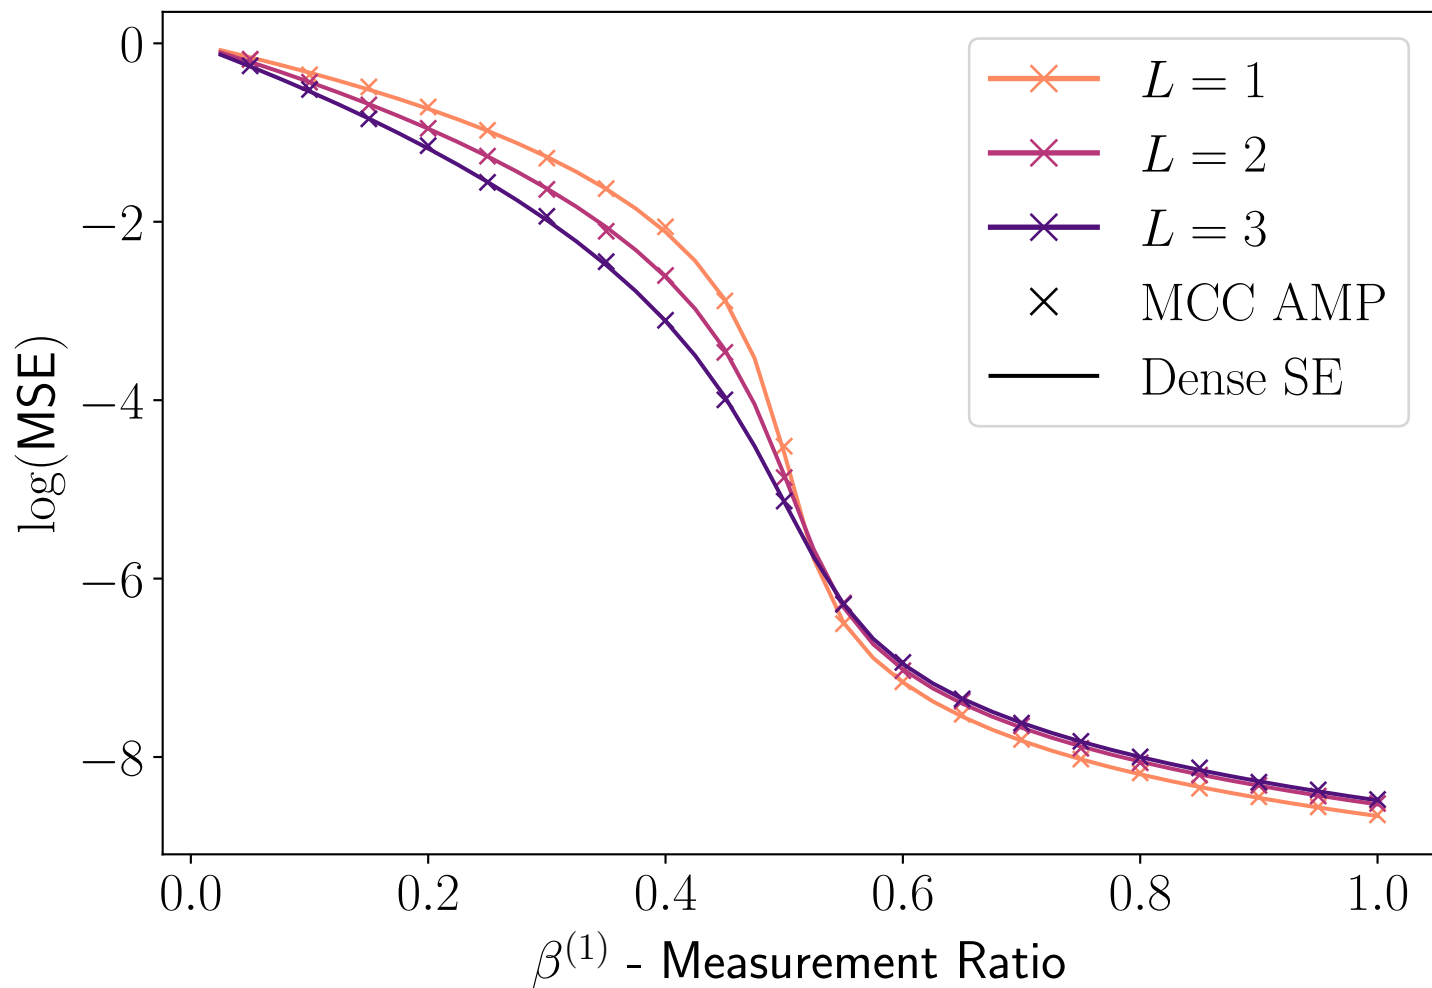

Supplement: supplementary_material [file attachment]

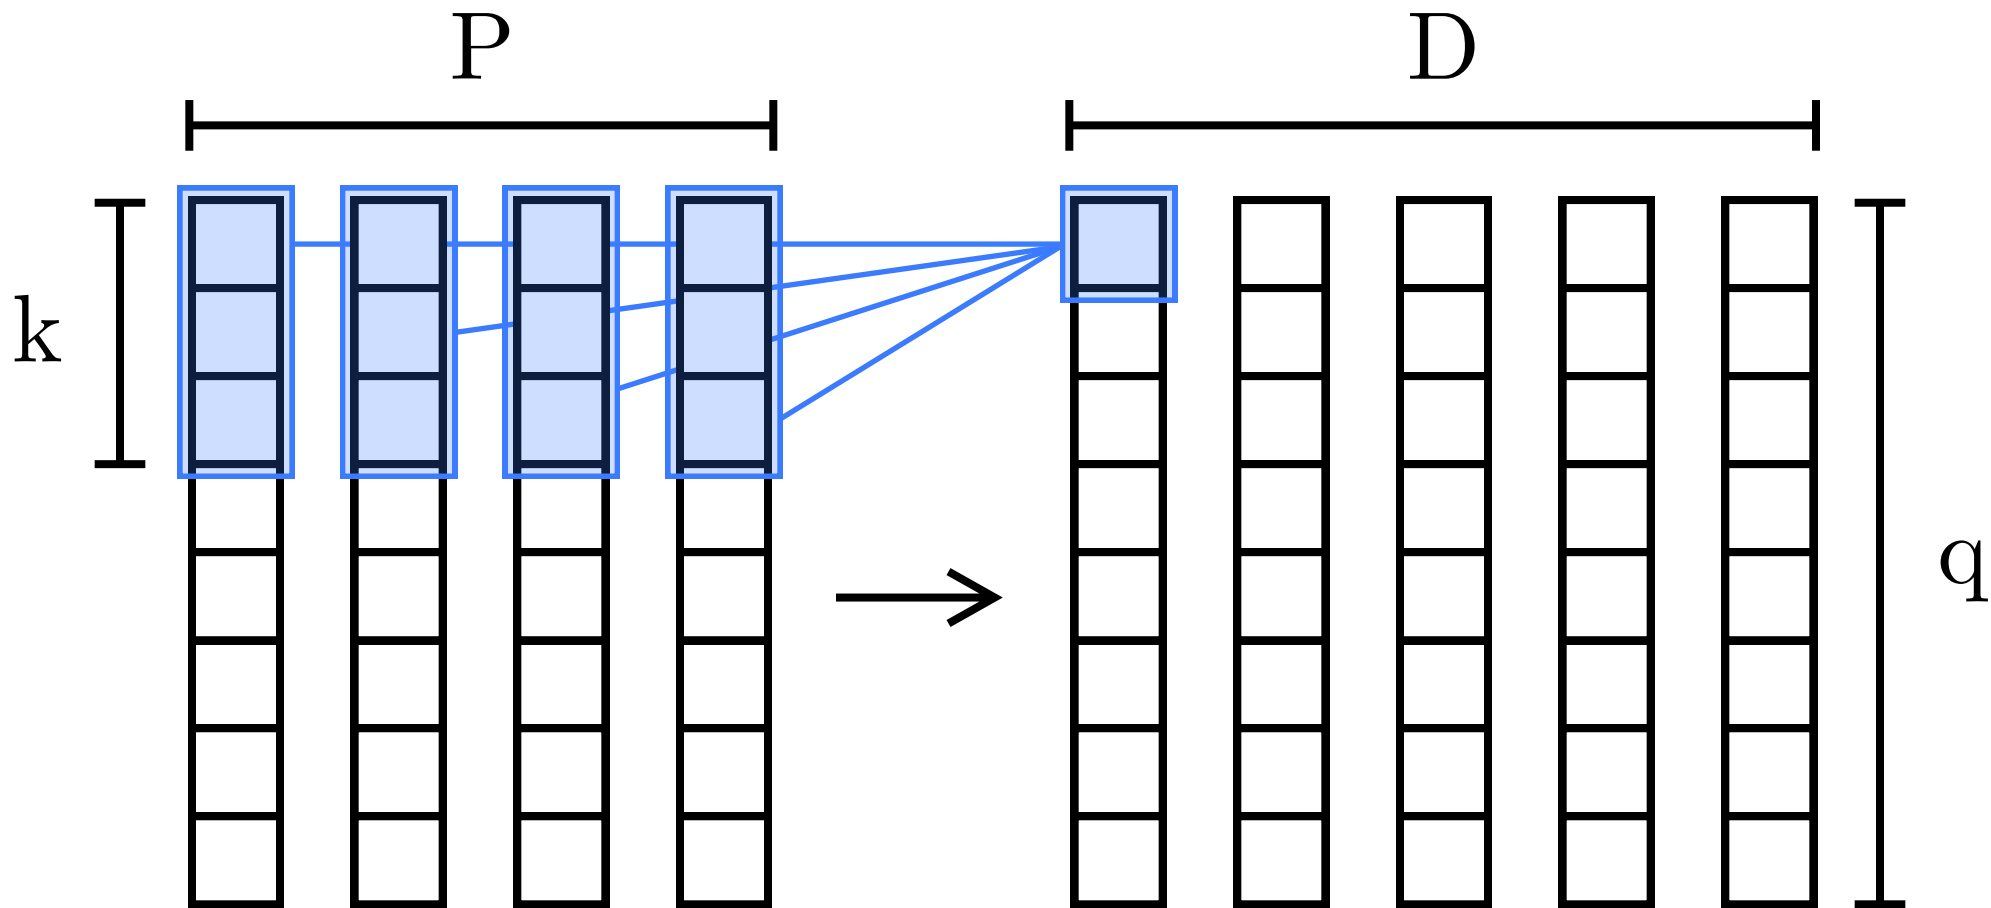

Supplement: supplementary_material [file attachment]

AMP Iterates for  $\rho = 0.25$  ( $q = P = 1024$ )

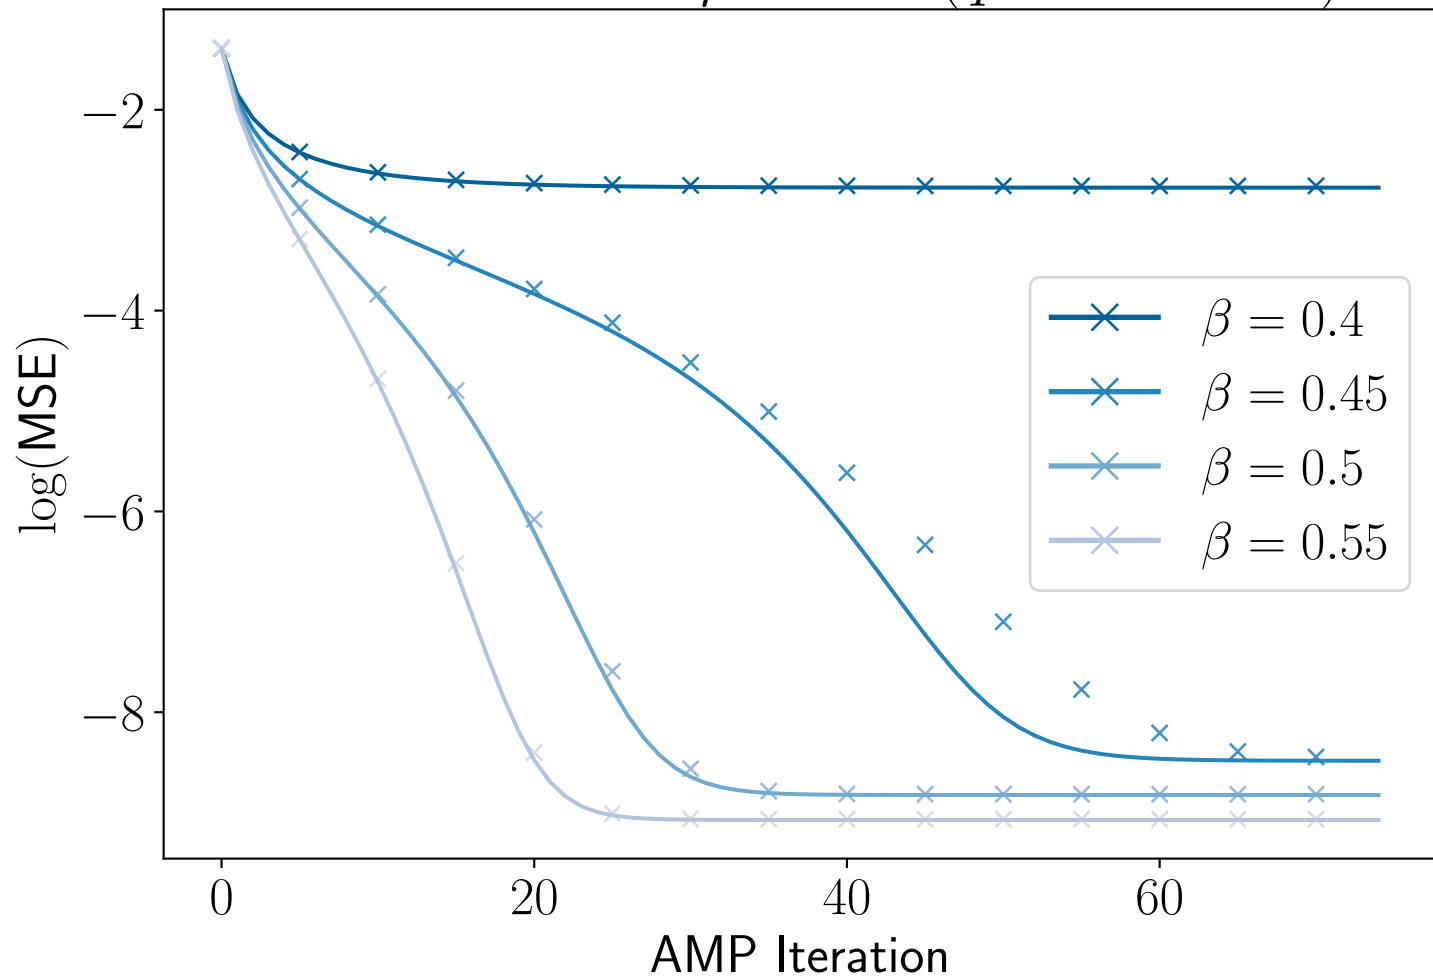

Supplement: supplementary_material [file attachment]

# Sparse Compressive Sensing ( $q = P = 1024$ )

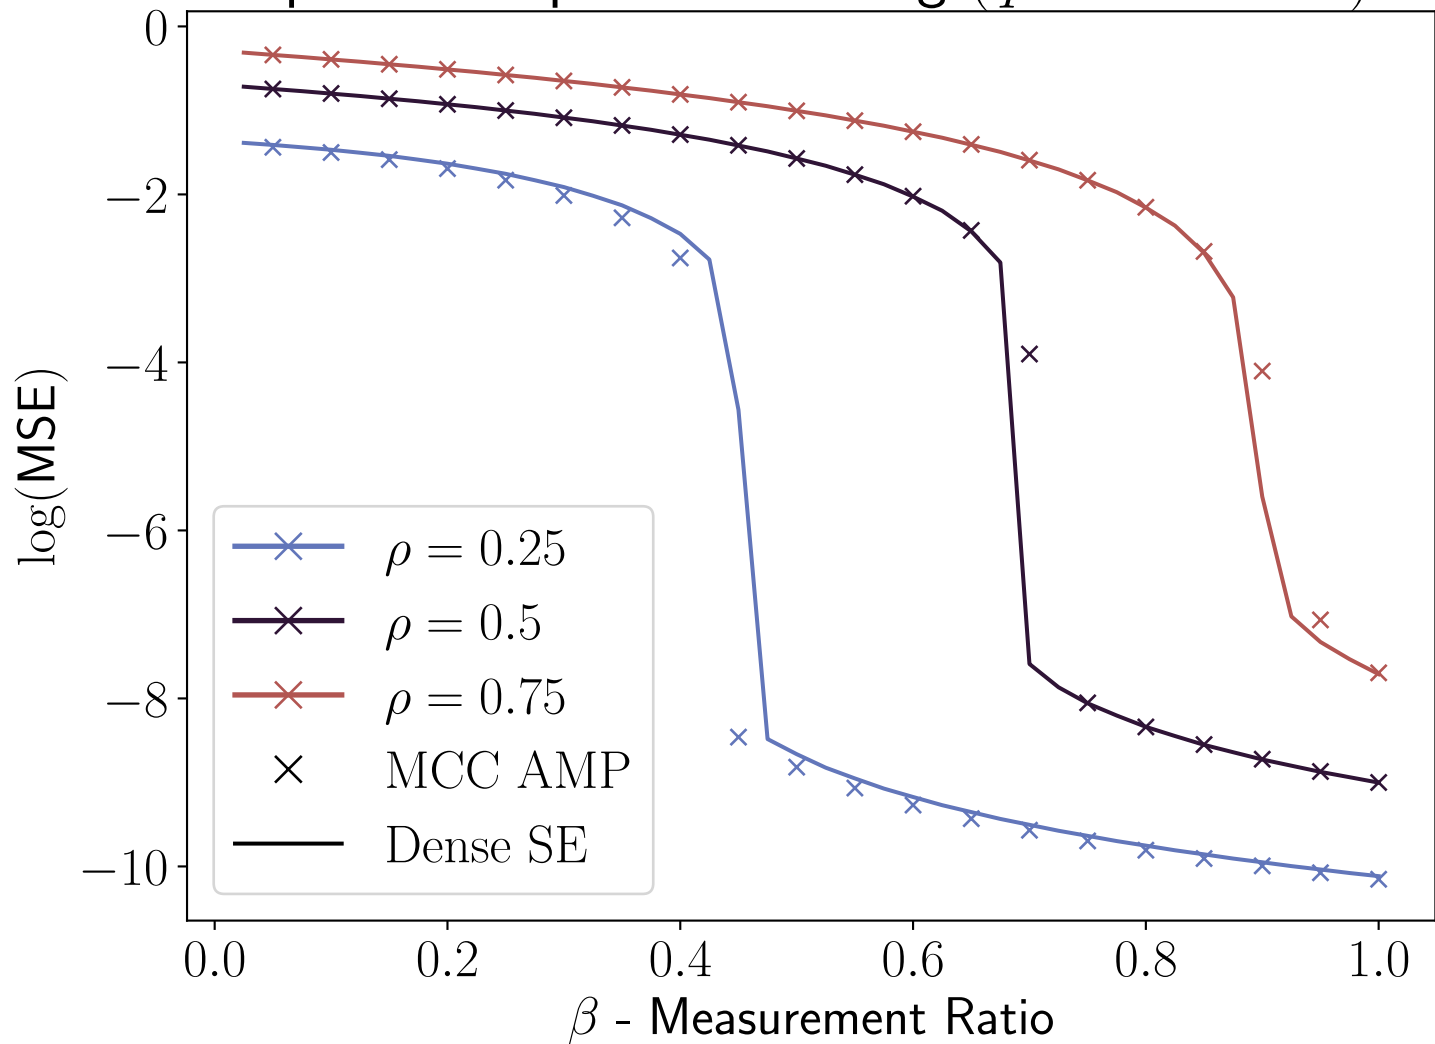

Supplement: supplementary_material [file attachment]
